# Supplementary material for: Structural basis for a human broadly neutralizing influenza A hemagglutinin stem-specific antibody including H17/18 subtypes
Source: PubMed Central journal article supplement (PMC9734383; doi:10.1038/s41467-022-35236-y), 2022-12-09
Supplement: 41467_2022_35236_MOESM2_ESM.pdf [file 41467_2022_35236_MOESM2_ESM.pdf]

# Supplementary Information

**Structural basis for a human broadly neutralizing influenza A  
hemagglutinin stem-specific antibody including H17/18 subtypes**

**Yulu Chen, et al**

Yulu Chen, Fei Wang, Liwei Yin, Haihai Jiang, Xishan Lu, Yuhai Bi, Wei Zhang, Yi Shi, Roberto Burioni, Zhou Tong, Hao Song, Jianxun Qi, George F. Gao

Supplementary Tables 1-2

Supplementary Figures 1-7

**Supplementary Table 1. Data collection and refinement statistics.**

|                                        | PN-SIA28               | PN-SIA28/H1             | PN-SIA28/H14            | PN-SIA28/H18             |
|----------------------------------------|------------------------|-------------------------|-------------------------|--------------------------|
| <b>Data collection</b>                 |                        |                         |                         |                          |
| Space group                            | P2 <sub>1</sub>        | P6 <sub>3</sub>         | P2 <sub>1</sub>         | P6 <sub>3</sub>          |
| <b>Cell dimensions</b>                 |                        |                         |                         |                          |
| a,b,c (Å)                              | 76.6, 86.4, 82.9       | 85.8, 85.8,<br>231.3    | 91.7, 121.0,<br>129.8   | 140.4, 140.4,<br>195.7   |
| $\alpha,\beta,\gamma$ (°)              | 90, 105.3, 90          | 90, 90, 120             | 90, 107.7, 90           | 90, 90, 120              |
| Resolution (Å)                         | 50-2.5<br>(2.50-2.59)* | 50-3.2<br>(3.2-3.31)*   | 50-3.4<br>(3.40-3.52)   | 50.0-2.60<br>(2.60-2.69) |
| R <sub>sym</sub> or R <sub>merge</sub> | 0.12 (0.39)            | 0.19 (2.40)             | 0.30 (1.30)             | 0.16 (1.68)              |
| <i>I</i> / $\sigma$ <i>I</i>           | 15.4 (7.9)             | 15.3 (1.0)              | 5.58 (1.1)              | 19.83 (1.66)             |
| Completeness (%)                       | 97.9 (99.9)            | 73.2 (100)              | 87 (99.9)               | 94.1 (97.0)              |
| Redundancy                             | 6.2                    | 12.6                    | 5.4                     | 16.5                     |
| No. of unique reflections              | 36196                  | 15923                   | 36855                   | 66862                    |
| Wilson B value                         | 26                     | 46                      | 53                      | 37                       |
| <b>Refinement</b>                      |                        |                         |                         |                          |
| Resolution (Å)                         | 42-2.5<br>(2.50-2.59)* | 45.6-3.2<br>(3.2-3.29)* | 49.7-3.4<br>(3.40-3.49) | 35.1-26.0<br>(2.60-2.69) |
| No. of reflections                     | 36175                  | 11635                   | 32697                   | 62969                    |
| R <sub>work</sub> or R <sub>free</sub> | 18.2/22.3              | 25.3/31.5               | 21.9/26.4               | 20.0/21.9                |
| <b>No. of atoms</b>                    |                        |                         |                         |                          |
| Protein                                | 6939                   | 5507                    | 15000                   | 5670                     |
| Ligand/ion                             | 0                      | 14                      | 126                     | 141                      |
| Water                                  | 299                    | 0                       | 0                       | 225                      |
| <b>B/factors</b>                       |                        |                         |                         |                          |

|                  |       |       |       |       |
|------------------|-------|-------|-------|-------|
| Protein          | 35    | 84    | 66    | 49    |
| Ligand/ion       | 0     | 59    | 734   | 87    |
| Water            | 35    | 0     | 0     | 47    |
| <b>R.m.s.d</b>   |       |       |       |       |
| Bond lengths (Å) | 0.003 | 0.004 | 0.003 | 0.005 |
| Bond angles (°)  | 0.662 | 0.9   | 0.56  | 0.92  |

R.m.s.d., root mean squared deviation. \*Values in parentheses are for highest-resolution shell.

**Supplementary Table 2a. Interaction between PN-SIA28 and H1**

| Heavy chain |             | HA1 (H1)                    | contacts <sup>a</sup> | Total contacts <sup>b</sup> |
|-------------|-------------|-----------------------------|-----------------------|-----------------------------|
| CDRH3       | F99         | H38, T318, V40              | 28, 13, 2             | (60)                        |
|             | G100        | H38, N20, H18               | 5, 3, 3               |                             |
|             | I100A       | H18                         | 6                     |                             |
| Heavy chain |             | HA2 (H1)                    | contacts <sup>a</sup> | Total contacts <sup>b</sup> |
| CDRH1       | S31         | I18                         | 7                     | (121)                       |
| CDRH2       | Y52A        | I18, D19, G16 (1), M17, Y34 | 10, 7, 4, 1, 1        |                             |
|             | Y56         | E150, Y34, A35, K153 (1)    | 3, 2, 3, 3            |                             |
| CDRH3       | I98         | R49, I45                    | 3, 4                  |                             |
|             | F99         | W21, I45, R49, I48          | 4, 1, 4, 2            |                             |
|             | G100        | W21                         | 1                     |                             |
|             | I100A       | I18, W21, G20, T41, I45     | 2, 17, 15, 1, 1       |                             |
|             | Y100B       | I18 (1), D19                | 8, 4                  |                             |
|             | I100C       | D19, I45                    | 3, 2                  |                             |
|             | I100D       | Q38                         | 1                     |                             |
|             | L100E       | Q42, Q38                    | 5, 1                  |                             |
|             | N100F       | R49                         | 1                     |                             |
|             | Light chain |                             | HA1 (H1)              |                             |
| FR3         | S60         | K280                        | 1                     | (1)                         |
| Light chain |             | HA1 (H1)                    | contacts <sup>a</sup> | Total contacts <sup>b</sup> |
| CDR1        | S31         | D46                         | 3                     | (55)                        |
|             | W32         | Q42, D46 (2), I45, R49      | 18, 14, 5, 7          |                             |
| CDRL2       | G50         | R49                         | 2                     |                             |
|             | S52         | E57                         | 1                     |                             |
|             | S53         | N53                         | 1                     |                             |
| CDR3        | A50         | Q42                         | 1                     |                             |
|             | H52         | Q42                         | 3                     |                             |

a. Numbers represent the number of atom to atom contacts between the antibody residues and the HA residues, which were analyzed by the Contact program in CCP4 suite (the distance cutoff is 4.5 angstroms). Numbers in parentheses represent the number of hydrogen bonds between atoms.

b. Numbers in parentheses represent the total number of atom to atom contacts.

**Supplementary Table 2b. Interaction between PN-SIA28 and H14**

| Heavy chain |       | HA1 (H14)               | contacts <sup>a</sup> | Total contacts <sup>b</sup> |
|-------------|-------|-------------------------|-----------------------|-----------------------------|
| CDRH3       | F99   | S38, T318               | 7, 14                 | (28)                        |
|             | G100  | T318                    | 3                     |                             |
|             | I100A | S38                     | 4                     |                             |
| Heavy chain |       | HA2 (H14)               | contacts <sup>a</sup> | Total contacts <sup>b</sup> |
| CDRH2       | Y52A  | I18, D19, G16           | 11, 11, 1             | (123)                       |
|             | Y56   | R153 (1), A35, E150     | 7, 3, 1               |                             |
| CDRH3       | I98   | I45, W21                | 6, 1                  |                             |
|             | F99   | L52, W21, I48, I45, N49 | 3, 2, 7, 13, 12       |                             |
|             | G100  | W21                     | 2                     |                             |
|             | I100A | W21, I18, G20, T41, I45 | 16, 5, 14, 1, 1       |                             |
|             | Y100B | I18 (1), D19            | 4, 2                  |                             |
|             | I100C | D19, T41, I45           | 2, 1, 1               |                             |
|             | L100E | Q42, L38                | 2, 4                  |                             |
| Light chain |       | HA2 (H14)               | contacts <sup>a</sup> | Total contacts <sup>b</sup> |
| CDRL1       | S30   | D46                     | 1                     | (82)                        |
|             | S31   | D46                     | 12                    |                             |
|             | W32   | Q42, D46(1), I45        | 28, 17, 4             |                             |
| CDRL2       | G50   | N53                     | 1                     |                             |
|             | S52   | N53 (1)                 | 7                     |                             |
|             | S53   | N53 (1), N49            | 7, 1                  |                             |
| CDRL3       | A91   | Q42                     | 1                     |                             |

a. Numbers represent the number of atom to atom contacts between the antibody residues and the HA residues, which were analyzed by the Contact program in CCP4 suite (the distance cutoff is 4.5 angstroms). Numbers in parentheses represent the number of hydrogen bonds between atoms.

b. Numbers in parentheses represent the total number of atom to atom contacts.

**Supplementary Table 2c. Interaction between PN-SIA28 and H18**

| Heavy chain |       | HA1 (H18)                    | contacts <sup>a</sup> | Total contacts <sup>b</sup> |
|-------------|-------|------------------------------|-----------------------|-----------------------------|
| CDRH3       | F99   | S38, T322                    | 4, 5                  | (15)                        |
|             | G100  | H18                          | 1                     |                             |
|             | I100A | H18                          | 5                     |                             |
| Heavy chain |       | HA2 (H18)                    | contacts <sup>a</sup> | Total contacts <sup>b</sup> |
| CDRH1       | S31   | I18                          | 6                     | (131)                       |
| CDRH2       | Y52A  | D19, I18, G16, Y34           | 7, 13, 1, 2           |                             |
|             | D53   | Y34                          | 1                     |                             |
|             | Y56   | D150, K153(1), Y34, A35, H26 | 1, 4, 2, 3, 2         |                             |
|             | Y58   | K38 (1)                      | 5                     |                             |
| CDRH3       | I98   | V45                          | 1                     |                             |
|             | F99   | W21, V45, T49, I48           | 12, 5, 3, 3           |                             |
|             | I100A | I18, G20, W21, T41, V45      | 4, 10, 11, 1, 1       |                             |
|             | Y100B | I18(1), D19                  | 10, 11                |                             |
|             | I100C | D19, T41                     | 5, 1                  |                             |
|             | I100D | K38                          | 1                     |                             |
|             | L100E | Q42, K38                     | 2, 3                  |                             |
| Light chain |       | HA2 (H18)                    | contacts <sup>a</sup> |                             |
| CDRL1       | S30   | D46 (1)                      | 6                     | (64)                        |
|             | S31   | D46 (1)                      | 5                     |                             |
|             | W32   | Q42, D46, V45                | 22, 10, 4             |                             |
| CDRL3       | A91   | Q42 (1)                      | 3                     |                             |
|             | H92   | Q42 (1)                      | 12                    |                             |
|             | F94   | K38                          | 2                     |                             |

a. Numbers represent the number of atom to atom contacts between the antibody residues and the HA residues, which were analyzed by the Contact program in CCP4 suite (the distance cutoff is 4.5 angstroms). Numbers in parentheses represent the number of hydrogen bonds between atoms.

b. Numbers in parentheses represent the total number of atom to atom contacts.

VH

|          |                       |           |       |               |    |                   |                     |                |                  |              |    |       |     |     |
|----------|-----------------------|-----------|-------|---------------|----|-------------------|---------------------|----------------|------------------|--------------|----|-------|-----|-----|
| UCA      | 1                     | 10        | 20    | 30            | 40 | 50                | 59                  | 69             | 79               | 86           | 96 | 100F  | 108 |     |
| PN-SIA28 | QVQLVESGGGVVQPGRSLRLS | CAASGFTFS | SYGMH | WVRQAPGKLEWVA | V  | ISYDGSNKYYADSVKGG | RFTISRDRNSKNTLYLQMN | SLRAEDTAVYYCAR | PSAIFGIYIILNGLDV | WGQGGTTVTVSS |    |       |     |     |
|          | QVQLVESGGGVVQPGRSLRLS | CAASGFTFS | SYGMH | WVRQAPGKLEWVA | G  | VSYDGSYKYYADSVKGG | RFTISRDRNSKNTLYLQMN | SLRAEDTAVYYCAR | PSAIFGIYIILNGLDV | WGQGGTTVTVSS |    |       |     |     |
|          | FR1                   |           |       | CDRH1         |    | FR2               |                     | CDRH2          |                  | FR3          |    | CDRH3 |     | FR4 |

  

VL

|          |                   |        |            |                |    |        |                    |              |           |             |     |       |  |     |
|----------|-------------------|--------|------------|----------------|----|--------|--------------------|--------------|-----------|-------------|-----|-------|--|-----|
| UCA      | 1                 | 10     | 20         | 30             | 40 | 50     | 60                 | 70           | 80        | 90          | 100 |       |  |     |
| PN-SIA28 | EIVLTQSPSSVSASVGD | RVITTC | RATQGISWLA | WYQQKPGKPKLLIF | G  | ASSLQS | GVPSRFSGSGGTDFTLTI | SSLPEDFATYFC | QQAHSFPLT | FGGGTKVEIKR |     |       |  |     |
|          | EIVLTQSPSSVSASVGD | RVITTC | RATQGISWLA | WYQQKPGKPKLLIF | G  | ASSLQS | GVPSRFSGSGGTDFTLTI | SSLPEDFATYFC | QQAHSFPLT | FGGGTKVEIKR |     |       |  |     |
|          | FR1               |        |            | CDRL1          |    | FR2    |                    | CDRL2        |           | FR3         |     | CDRL3 |  | FR4 |

**Supplementary Figure 1. Alignment of VH and VL amino acid sequences of PN-SIA28 and its unmutated common ancestor (UCA).** The amino acid residues are numbered and the CDR and FR segments are labeled according to Kabat numbering. The amino acid substitutions are highlighted in red.

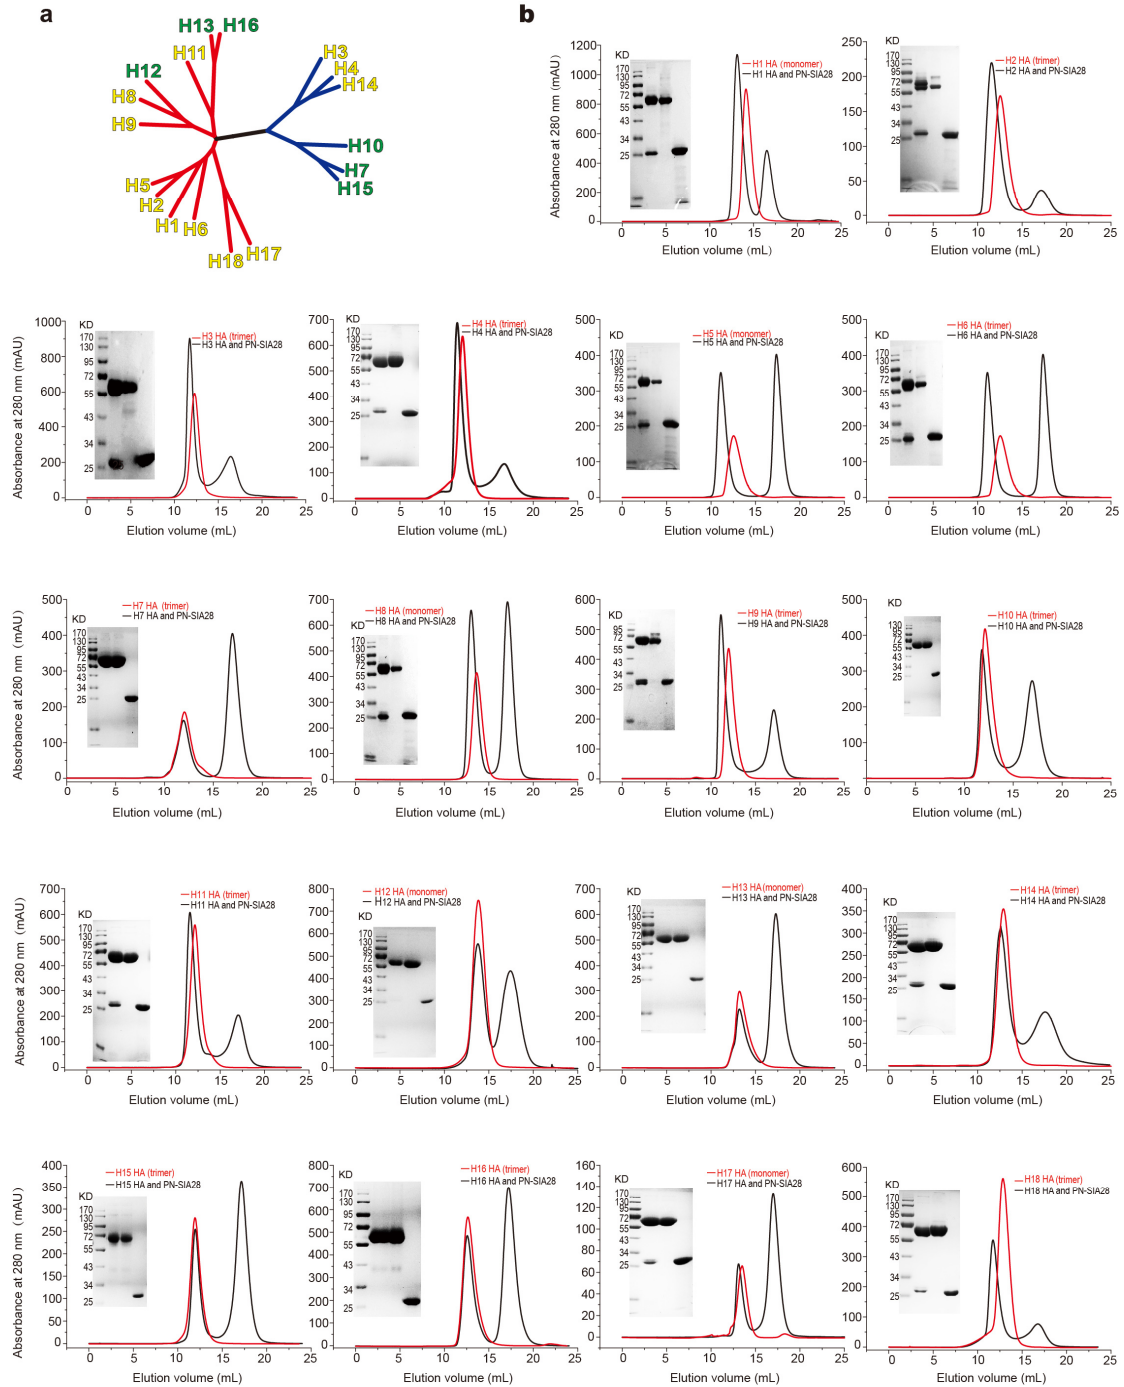

**Supplementary Figure 2. Binding properties of different HA proteins with PN-SIA28.**

**a**, Phylogenetic tree of influenza A HAs generated by MEGA software. Group 1 and group 2 are colored in red and blue. The HAs further subdivided into binding or not binding to PN-SIA28 are denoted in yellow and green characters, respectively. **b**, Gel filtration analysis of PN-SIA28. The HA proteins which bind to PN-SIA28 have a shifting forward elution peak in comparison to those HA proteins alone (H1, H2, H3,



H4, H5, H6, H8, H9, H11, H14, H17 and H18), whereas the HA proteins (H7, H10, H12, H13, H15 and H16) that cannot form complex with PN-SIA28 have no shift peak. The SDS-PAGE lanes represents the proteins of three peaks respectively. The data presented here are representative of two independent experiments with similar results. Source data are provided as a Source Data file.

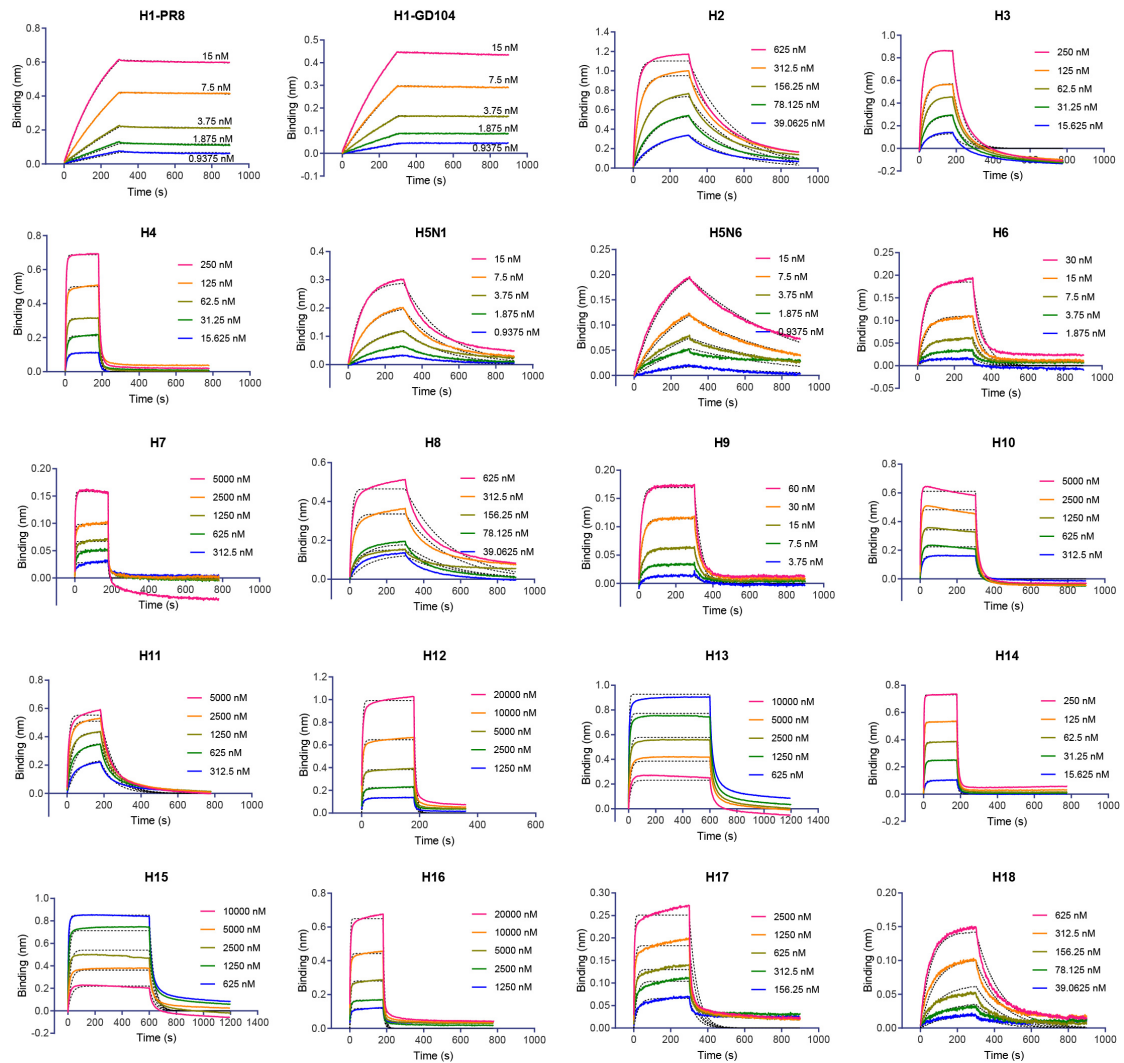

**Supplementary Figure 3. Kinetic binding curves for interaction between different HAs and PN-SIA28.** Solid curves are the experimental trace obtained from BLI experiments, and the black dotted curves were obtained by fitting data to the 1:1 binding model (Octet RED96 analysis software 7.0). Affinity measurements (KD values) for the binding curves were reported in Fig. 1a. The data presented here are representative of two independent experiments with similar results. Source data are provided as a Source Data file.

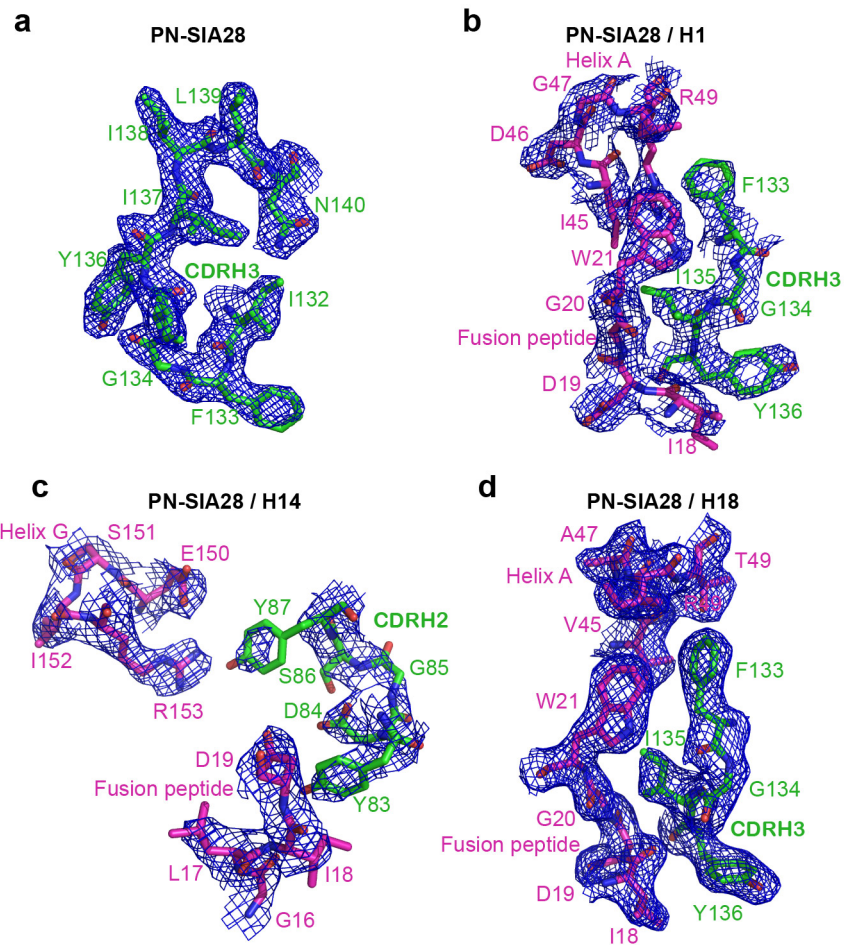

**Supplementary Figure 4. Representative 2Fo-Fc maps showing a portion of PN-SIA28 or PN-SIA28/HA complex structures.** The portion of 2Fo-Fc electron maps of PN-SIA28 (a), PN-SIA28/H1 (b), PN-SIA28/H14 (c), and PN-SIA28/H18 (d) structures are contoured at 1.0  $\sigma$  level with the final structure shown in stick models. The 2Fo-Fc maps were generated by FFT program in CCP4 software, and the figures were drawn by Pymol software.

| Number<br>HA | HA1 |    |    |    |     |     | HA2 |    |    |    |    |    |    |    |    |    |    |    |    |    |    |    |    |    |    |     |     |
|--------------|-----|----|----|----|-----|-----|-----|----|----|----|----|----|----|----|----|----|----|----|----|----|----|----|----|----|----|-----|-----|
|              | 18  | 20 | 38 | 40 | 280 | 318 | 16  | 17 | 18 | 19 | 20 | 21 | 26 | 34 | 35 | 38 | 41 | 42 | 45 | 46 | 48 | 49 | 52 | 53 | 57 | 150 | 153 |
| H1           | H   | N  | H  | V  | K   | T   | G   | M  | I  | D  | G  | W  | H  | Y  | A  | Q  | T  | Q  | I  | D  | I  | R  | V  | N  | E  | E   | K   |
| H2           | H   | N  | H  | K  | K   | T   | G   | M  | I  | D  | G  | W  | H  | Y  | A  | K  | T  | Q  | F  | D  | I  | T  | V  | N  | E  | N   | K   |
| H5           | H   | N  | H  | Q  | K   | T   | G   | M  | V  | D  | G  | W  | H  | Y  | A  | K  | T  | Q  | I  | D  | I  | T  | V  | N  | E  | E   | K   |
| H6           | H   | N  | H  | V  | T   | T   | G   | L  | I  | D  | G  | W  | H  | Y  | A  | R  | T  | Q  | I  | D  | I  | T  | V  | N  | E  | E   | K   |
| H8           | Q   | N  | Q  | M  | K   | V   | G   | M  | I  | D  | G  | W  | H  | M  | A  | O  | T  | Q  | I  | D  | I  | T  | V  | N  | E  | E   | K   |
| H9           | Q   | T  | H  | K  | K   | V   | G   | L  | V  | A  | G  | W  | H  | M  | A  | R  | T  | Q  | I  | D  | I  | T  | V  | N  | E  | E   | R   |
| H11          | L   | N  | S  | V  | K   | T   | G   | L  | I  | N  | G  | W  | H  | I  | A  | K  | T  | Q  | I  | D  | I  | T  | V  | N  | E  | E   | R   |
| H17          | Q   | N  | G  | Q  | K   | T   | G   | M  | I  | D  | G  | W  | H  | Y  | A  | K  | T  | Q  | V  | D  | I  | T  | V  | N  | E  | D   | K   |
| H18          | H   | N  | S  | H  | I   | T   | G   | L  | I  | D  | G  | W  | H  | Y  | A  | K  | T  | Q  | V  | D  | I  | T  | V  | N  | E  | D   | K   |
| H12          | Q   | N  | Q  | E  | E   | I   | G   | L  | I  | A  | G  | W  | H  | I  | A  | R  | T  | Q  | I  | D  | M  | Q  | L  | N  | E  | D   | R   |
| H13          | L   | T  | S  | I  | K   | T   | G   | L  | I  | N  | G  | W  | H  | I  | A  | K  | T  | Q  | I  | D  | I  | T  | I  | N  | E  | E   | R   |
| H16          | L   | N  | S  | I  | K   | T   | G   | L  | I  | N  | G  | W  | H  | I  | A  | K  | T  | Q  | I  | N  | I  | T  | I  | N  | E  | E   | R   |
| H3           | H   | V  | N  | T  | E   | T   | G   | M  | I  | D  | G  | W  | H  | Q  | A  | L  | T  | Q  | I  | D  | I  | N  | L  | N  | E  | E   | R   |
| H4           | H   | V  | T  | Q  | K   | T   | G   | L  | I  | D  | G  | W  | H  | T  | A  | L  | T  | Q  | I  | D  | I  | N  | L  | N  | E  | E   | R   |
| H14          | H   | V  | S  | K  | P   | T   | G   | L  | I  | D  | G  | W  | H  | T  | A  | L  | T  | Q  | I  | D  | I  | N  | L  | N  | E  | E   | R   |
| H7           | H   | V  | N  | T  | D   | T   | G   | L  | I  | D  | G  | W  | H  | T  | A  | Y  | T  | Q  | I  | D  | I  | T  | L  | N  | E  | A   | R   |
| H10          | H   | V  | N  | T  | K   | T   | G   | M  | V  | D  | G  | W  | H  | Q  | A  | Y  | T  | Q  | I  | D  | I  | T  | L  | N  | E  | E   | R   |
| H15          | H   | V  | N  | T  | E   | L   | G   | L  | I  | D  | G  | W  | H  | T  | A  | Y  | T  | Q  | I  | D  | I  | T  | L  | N  | E  | E   | R   |

**Supplementary Figure 5. Sequence comparison of PN-SIA28 epitope among 18 HA subtypes.** Hemagglutinin alignment showing the PN-SIA28 contact residues shaded in yellow as defined by residues within 4.5 Å of PN-SIA28.

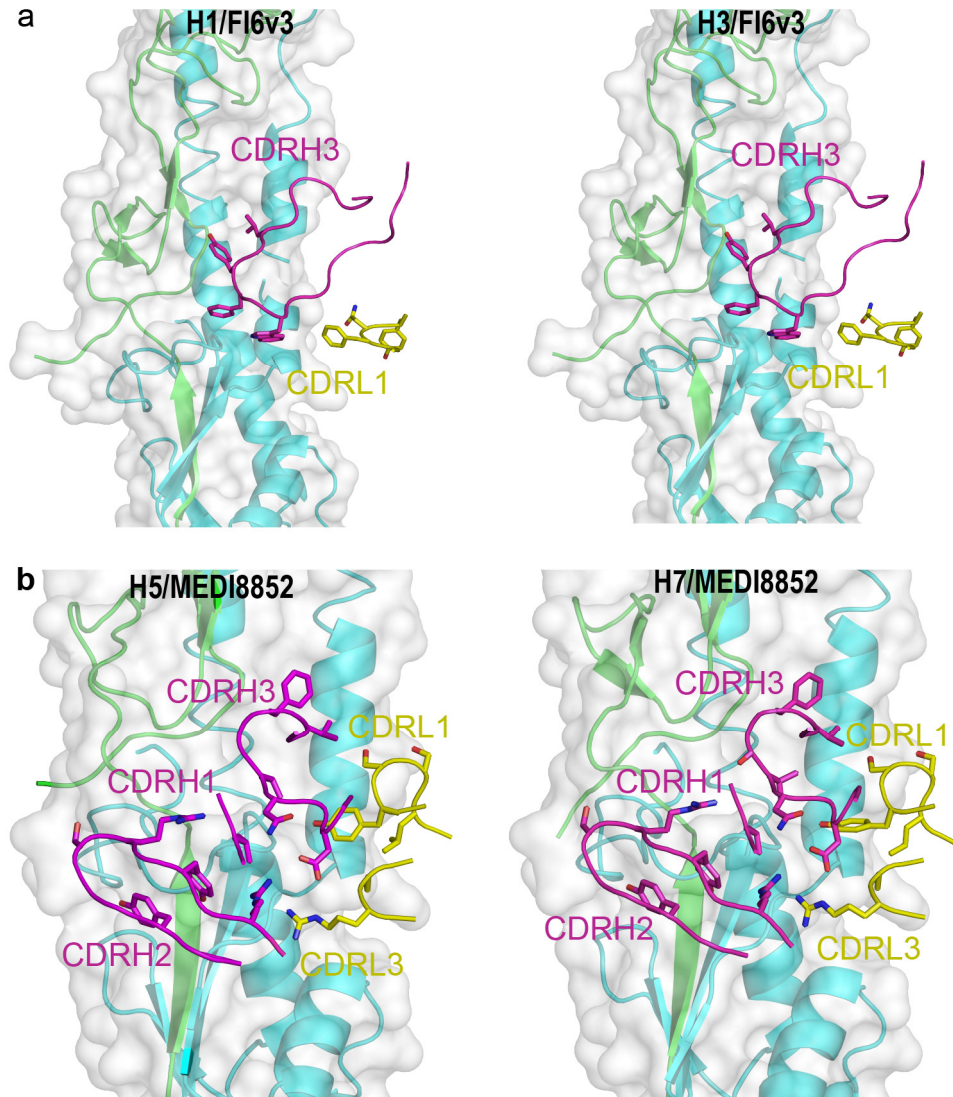

**Supplementary Figure 6. Two bnAbs bind to HAs of different groups with same CDRs.**

**a-b,** Two bnAbs interact with group 1 and group 2 HAs. The overall structure of the HA is shown in cartoon and surface representation from the side view. HA1 and HA2 of HA are colored in green and cyan, respectively. **a,** FI6v3 binds to H1 (group 1) and H3 (group 2) with the same CDRH (CDRH3) and CDRL (CDRL1). The CDRH and CDRL of FI6v3 are colored in magenta and yellow, respectively. The key interacting residues of FI6v3 are shown as sticks. **b,** MEDI8852 binds to H5 (group 1) and H7 (group 2) with the same CDRHs (CDRH1, CDRH2, CDRH3) and CDRLs (CDRL1, CDRL3). The CDRHs and CDRLs of MEDI8852 are colored in magenta and yellow, respectively. The key interacting residues of MEDI8852 are shown as sticks.

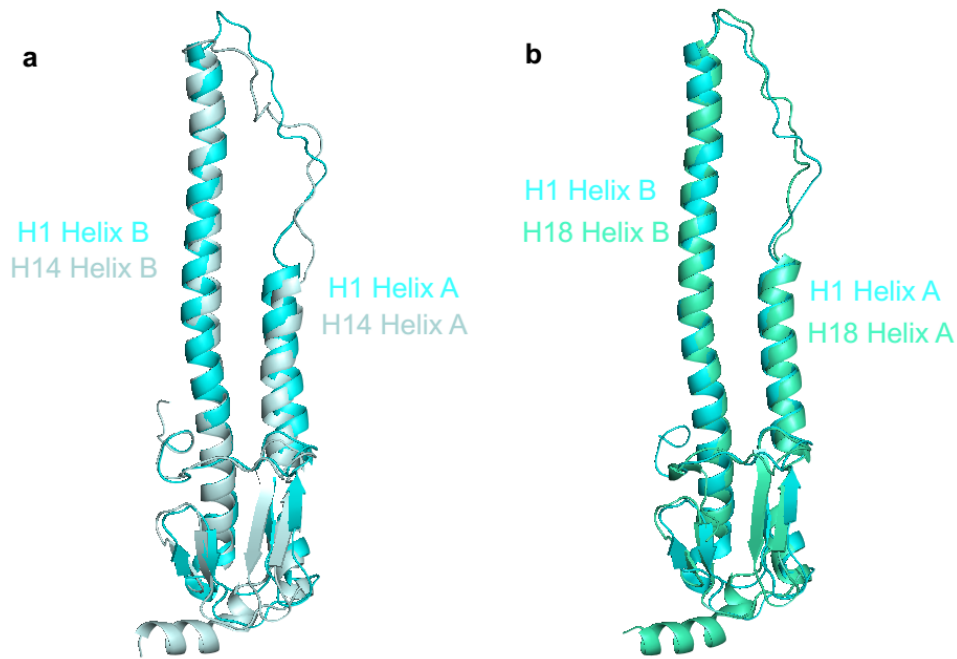

**Supplementary Figure 7. Overlay of HA2s in HA/PN-SIA28 complexes.** The overall structure of the HA2 is shown in cartoon representation from the side view. **a**, Overlay of HA2s in H1/PN-SIA28 and H14/PN-SIA28 complexes. The alignments were carried out by fixing Helix B. The HA2s are colored according to Fig. 4. **b**, Overlay of HA2s in H1/PN-SIA28 and H18/PN-SIA28 complexes. The alignments were carried out by fixing Helix B. The HA2s are colored according to Fig. 4.
